# Supplementary material
Source: Springer Nature journal article supplement (https://www.springermedizin.de/resource/supplementary/12876_2006_6_MOESM1_ESM.pdf/9438984)
Supplement: MOESM1 [file 9438984]

MEDLINE (1966— June, 2006)  
EMBASE.com (1966— June, 2006)  
CBMdisc (January, 1978— June, 2006)  
Cochrane Controlled Trial Register (Issue 2, 2006)

Potentially appropriate trials to be  
included in meta-analysis (n=25)

Five additional studies were identified  
from the reference lists of pertinent  
reviews and retrieved articles

n=30

Randomized controlled trials  
included in meta-analysis  
(n=4)

Excluded (n=26)  
Reviews or editorials (n=9)  
Meta-analysis (n=2)  
Repeat publication (n=2)  
Abstract or data insufficient (n=5)  
Incorrect randomization (n=1)  
Placebo group lacking (n=1)  
Others (n=6)
